# Supplementary material
Source: PubMed Central journal article supplement (PMC4787358)
Supplement: berg679159.wt1_default.pdf [file berg679159.wt1_default.pdf]

## Aspirin for primary prevention of cardiovascular disease in diabetes: current guidelines

---

| <b>Guideline</b>                                                                                      | <b>Year of publication</b> | <b>ASA for prevention of CVD</b>                               |
|-------------------------------------------------------------------------------------------------------|----------------------------|----------------------------------------------------------------|
| International Diabetes Federation – IDF <sup>1</sup>                                                  | 2006                       | Recommended in people at high risk                             |
| American Heart Association – American Diabetes Association - AHA-ADA <sup>2</sup>                     | 2007                       | Recommended in all individuals >40 yrs or with CV risk factors |
| European Society of Cardiology/European Association for the Study of Diabetes - ESC/EASD <sup>3</sup> | 2007                       | Recommended for stroke                                         |
| American Association Of Clinical Endocrinologists AACE <sup>4</sup>                                   | 2007                       | Recommended                                                    |
| Canadian Diabetes Association <sup>5</sup>                                                            | 2008                       | No evidence, use left to individual clinical judgment          |

---
